# Supplementary material for: Study of the Molecular Properties of Mono- and Binuclear Metal s-Indacenyl Complexes with Ir, Rh, and Re: A Theoretical Approach
Source: Hindawi journal article supplement (doi:10.1155/2017/9101720), 2017-01-01
Supplement: f1 [file 9101720.f1.pdf]

*Supporting Information for*

**Study of the Molecular Properties of Mono and Binuclear Metal *s*-Indacenyl Complexes with Ir, Rh and Re: A Theoretical Approach**

Ximena Zarate\*<sup>a</sup>, Eduardo Schott,<sup>b</sup> Emilio Bunel,<sup>c</sup> Juan M. Manríquez,<sup>b</sup> Ivonne Chávez.\*<sup>b</sup>

<sup>a</sup>Instituto de Ciencias Químicas Aplicadas, Facultad de Ingeniería, Universidad Autónoma de Chile. Av. Pedro de Valdivia 641, Santiago, Chile.

<sup>b</sup>Departamento de Química Inorgánica, Facultad de Química, Pontificia Universidad Católica de Chile, Santiago, Casilla 306, Chile

<sup>c</sup>Argonne National Laboratory, Argonne, IL, USA 60439

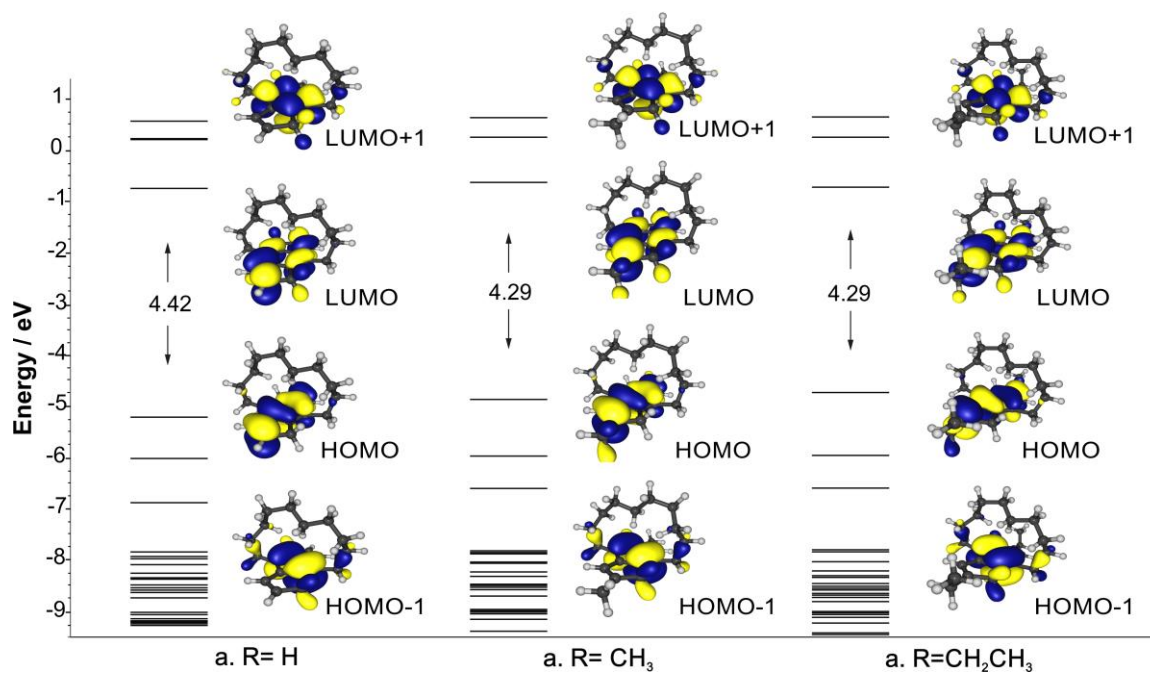

**Figure S1.** Structures of the studied systems. **a.** Neutral ligand.

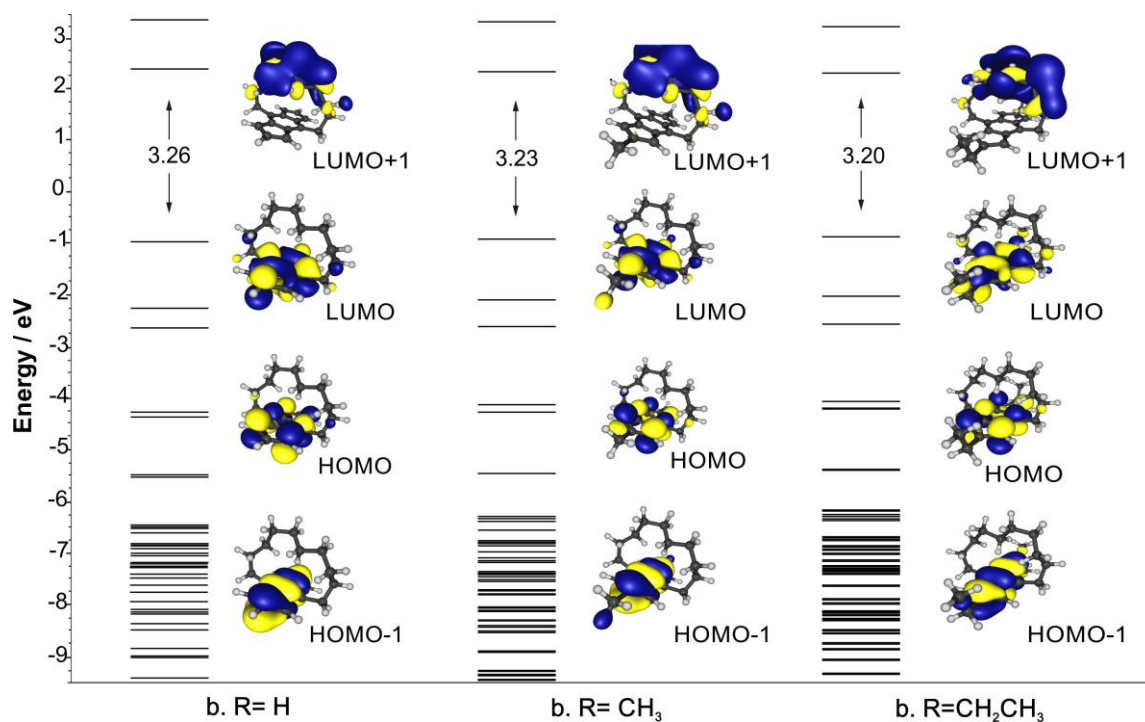

**Figure S2. b.** Ligand dianion.

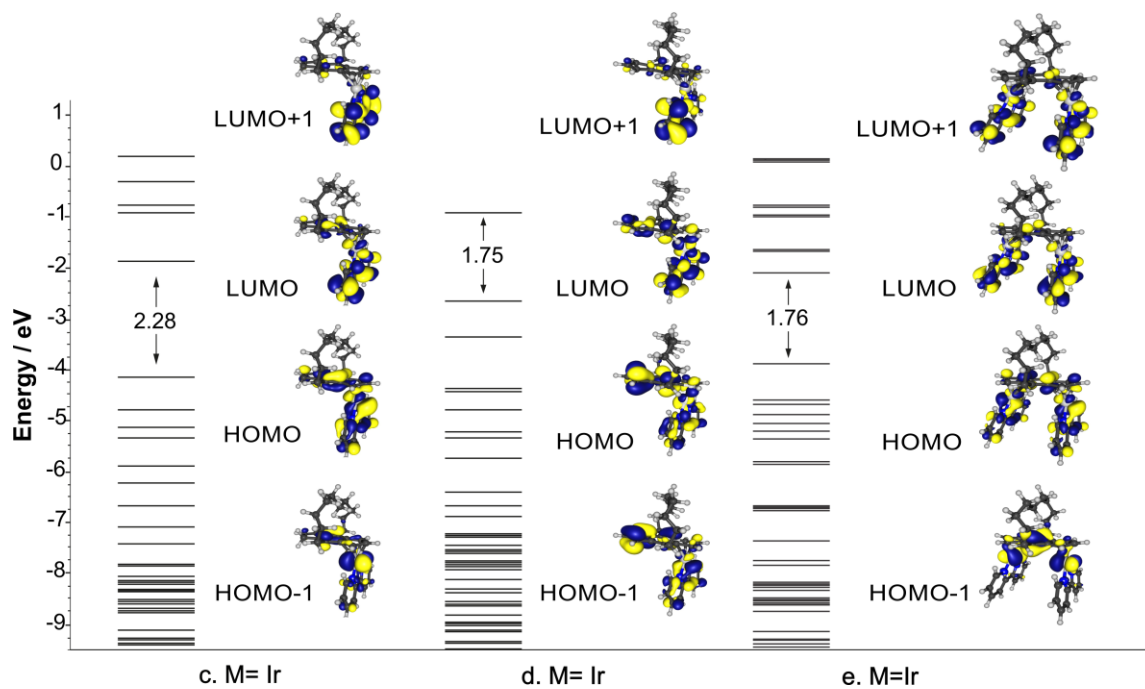

**Figure S3. c.** monometallic neutron, **d.** monometallic monoanion and **e.** bimetallic system with M=Ir, L=bipy and R=H.

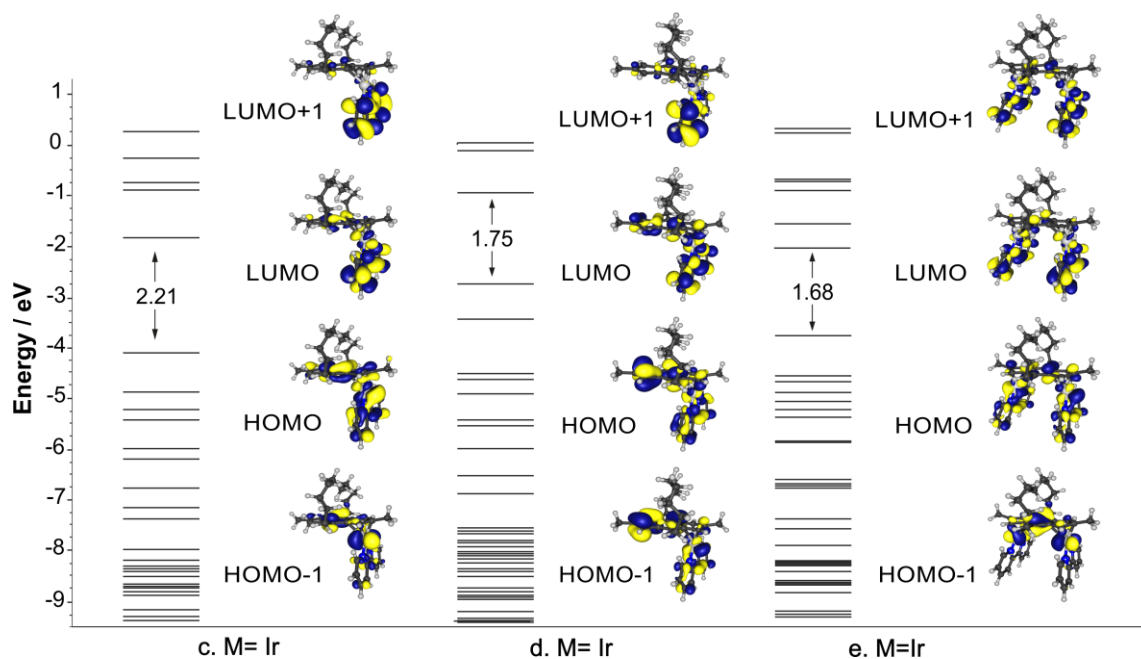

**Figure S4.** **c.** monometallic neutron, **d.** monometallic monoanion and **e.** bimetallic system with M=Ir, L=bipy and R=CH<sub>3</sub>.

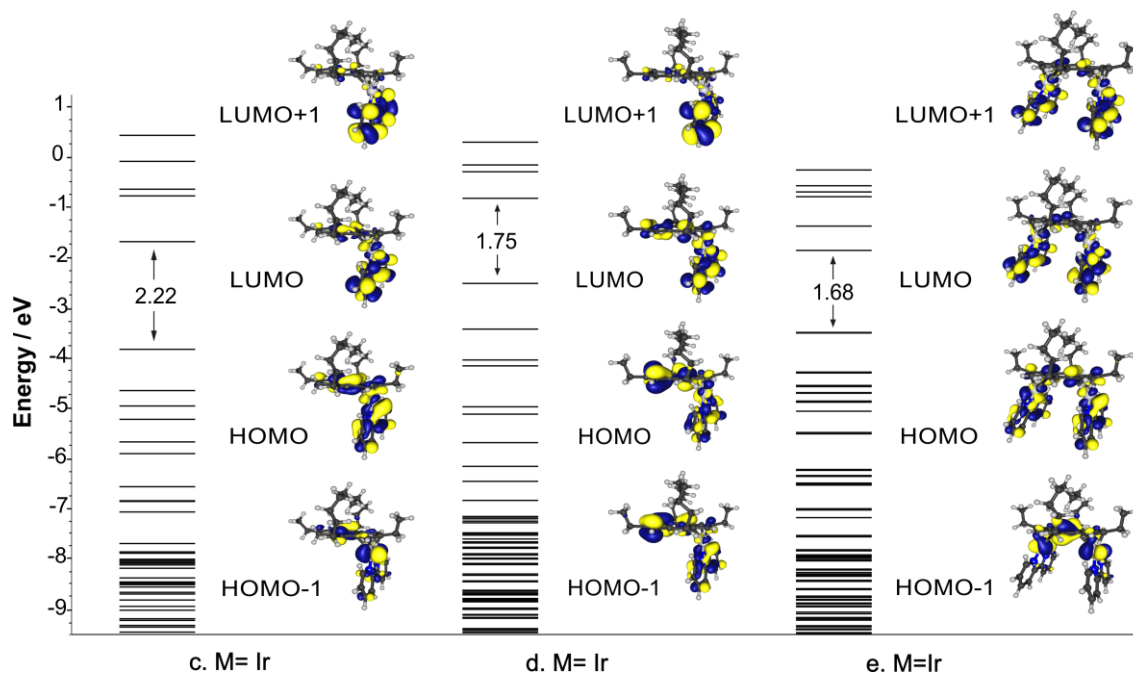

**Figure S5.** **c.** monometallic neutron, **d.** monometallic monoanion and **e.** bimetallic system with M=Ir, L=bipy and R=CH<sub>2</sub>CH<sub>3</sub>.

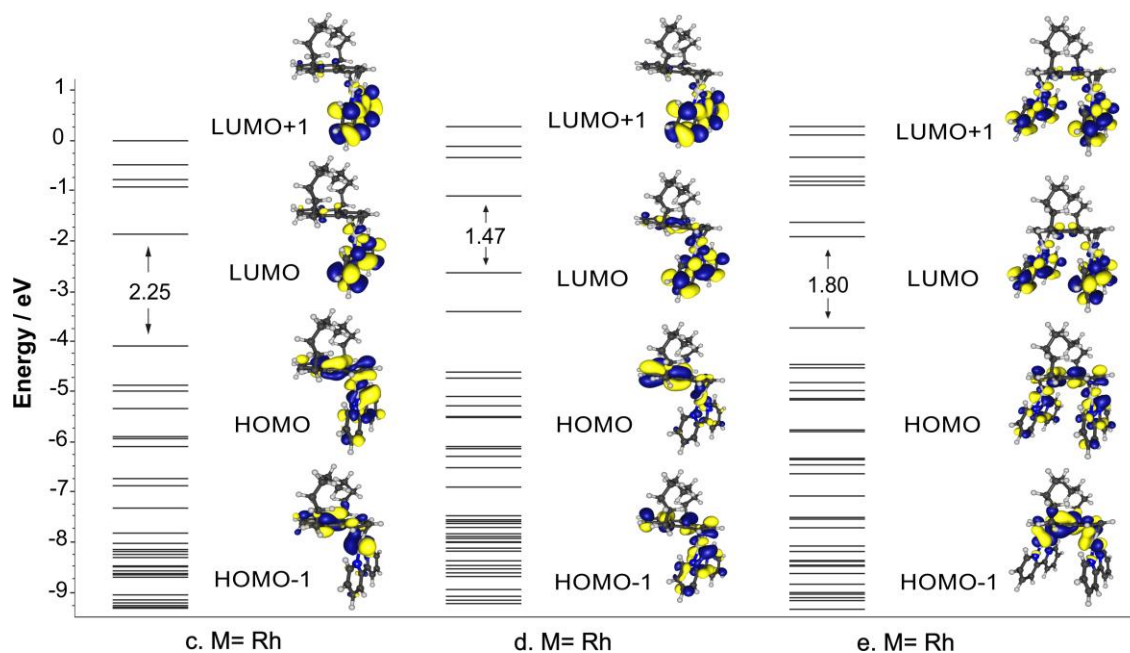

**Figure S6.** **c.** monometallic neutron, **d.** monometallic monoanion and **e.** bimetallic system with  $M = \text{Rh}$ ,  $L = \text{bipy}$  and  $R = \text{H}$ .

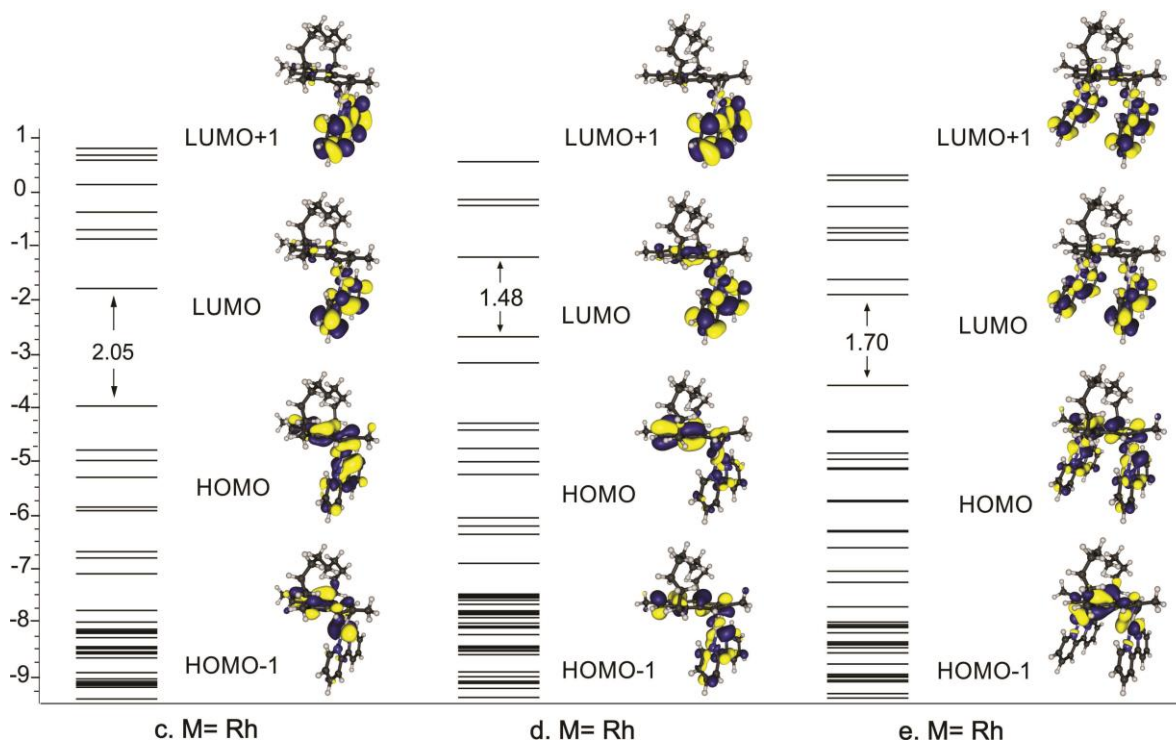

**Figure S7.** **c.** monometallic neutron, **d.** monometallic monoanion and **e.** bimetallic system with  $M = \text{Rh}$ ,  $L = \text{bipy}$  and  $R = \text{CH}_3$ .

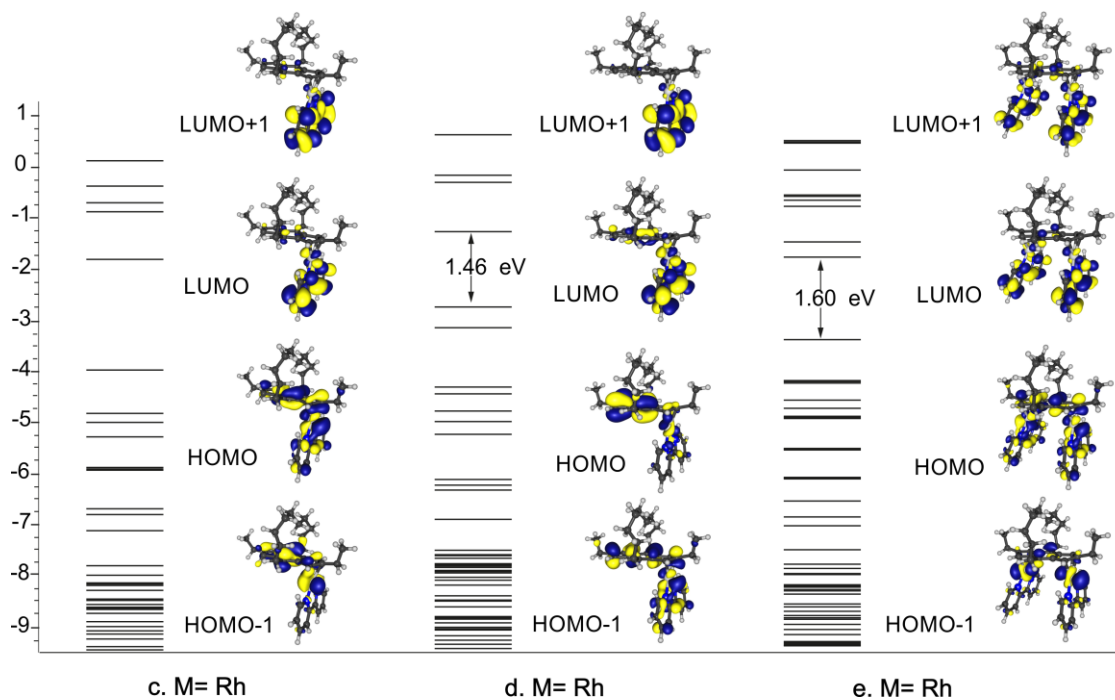

**Figure S8.** **c.** monometallic neutron, **d.** monometallic monoanion and **e.** bimetallic system with M=Rh, L=bipy and R=CH<sub>2</sub>CH<sub>3</sub>.

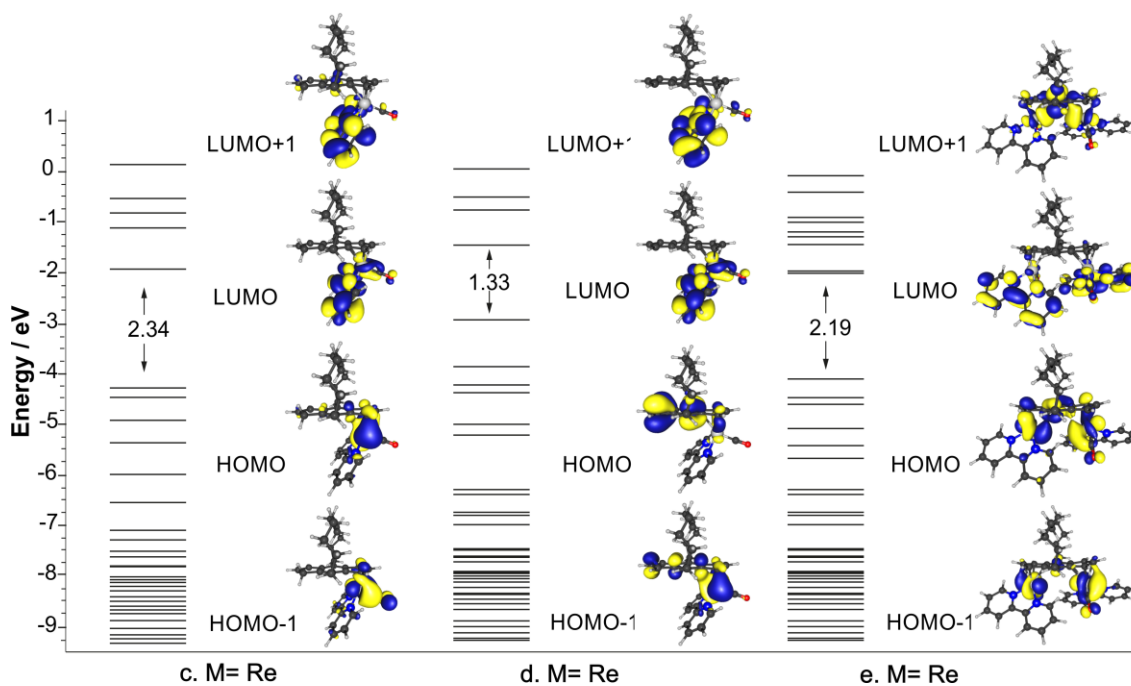

**Figure S9.** **c.** monometallic neutron, **d.** monometallic monoanion and **e.** bimetallic system with M=Re, L=bipy,CO and R=H.

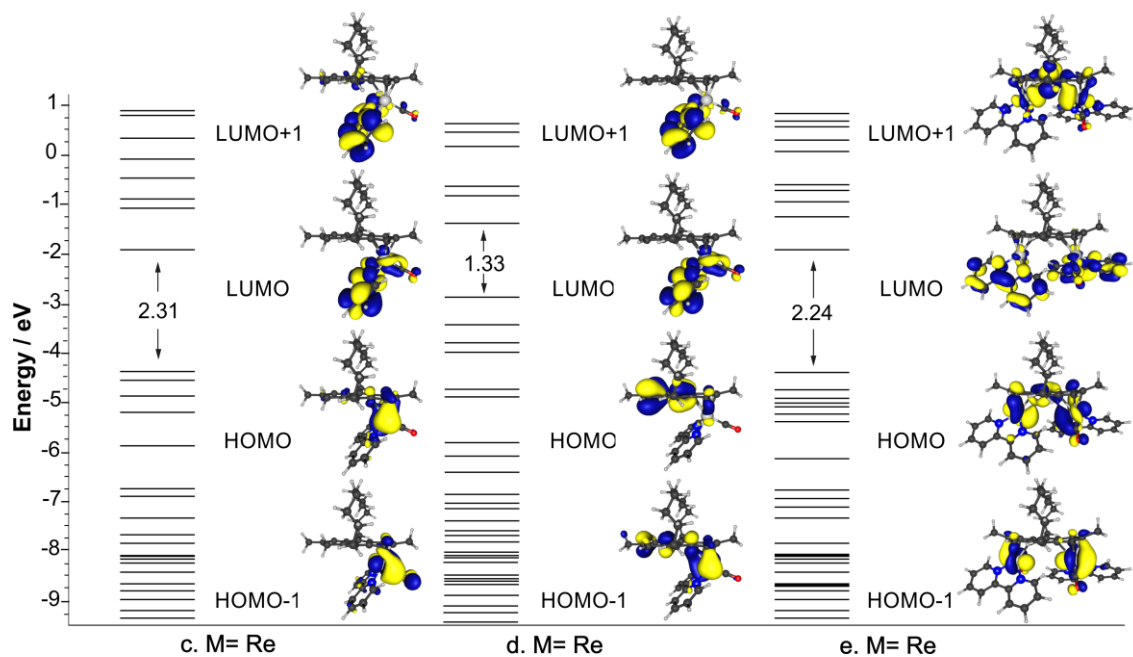

**Figure S10.** **c.** monometallic neutron, **d.** monometallic monoanion and **e.** bimetallic system with M=Re, L=bipy,CO and R=CH<sub>3</sub>.

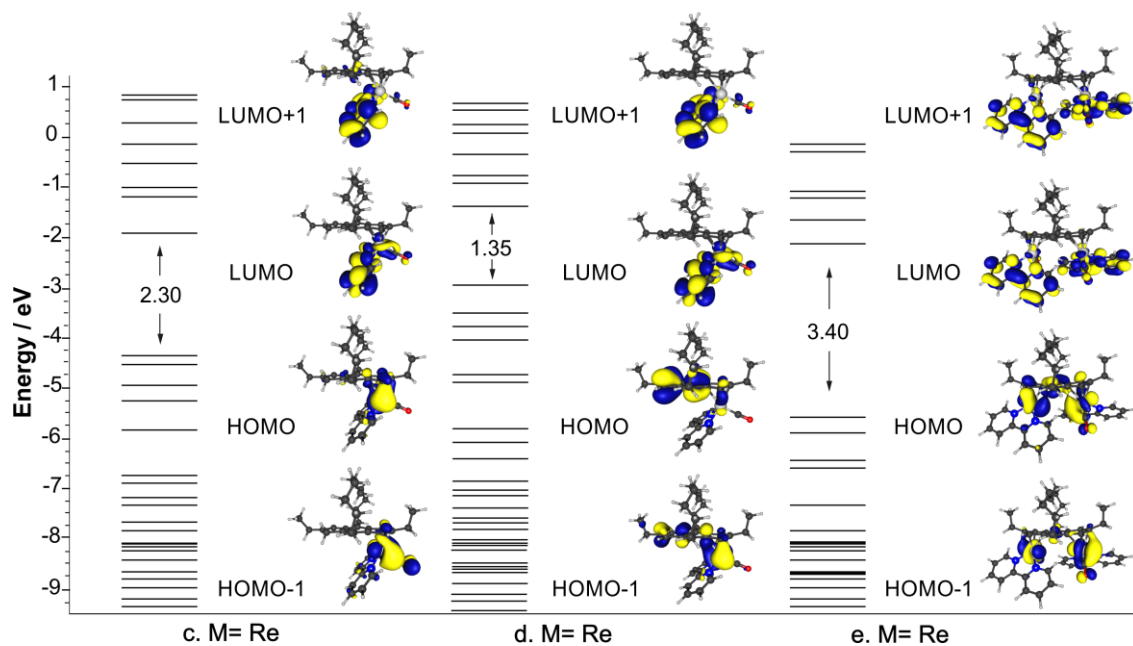

**Figure S11.** **c.** monometallic neutron, **d.** monometallic monoanion and **e.** bimetallic system with M=Re, L=bipy,CO and R=CH<sub>2</sub>CH<sub>3</sub>.

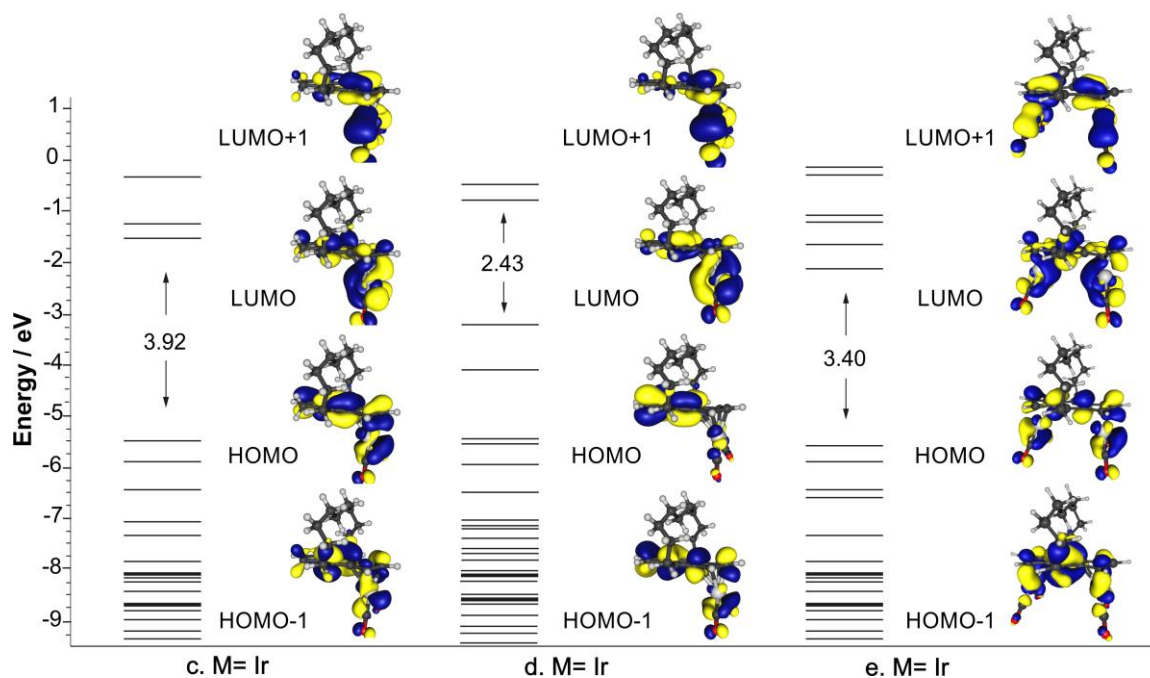

**Figure S12.** **c.** monometallic neutron, **d.** monometallic monoanion and **e.** bimetallic system with  $M=Ir$ ,  $L=(CO)_2$  and  $R=H$ .

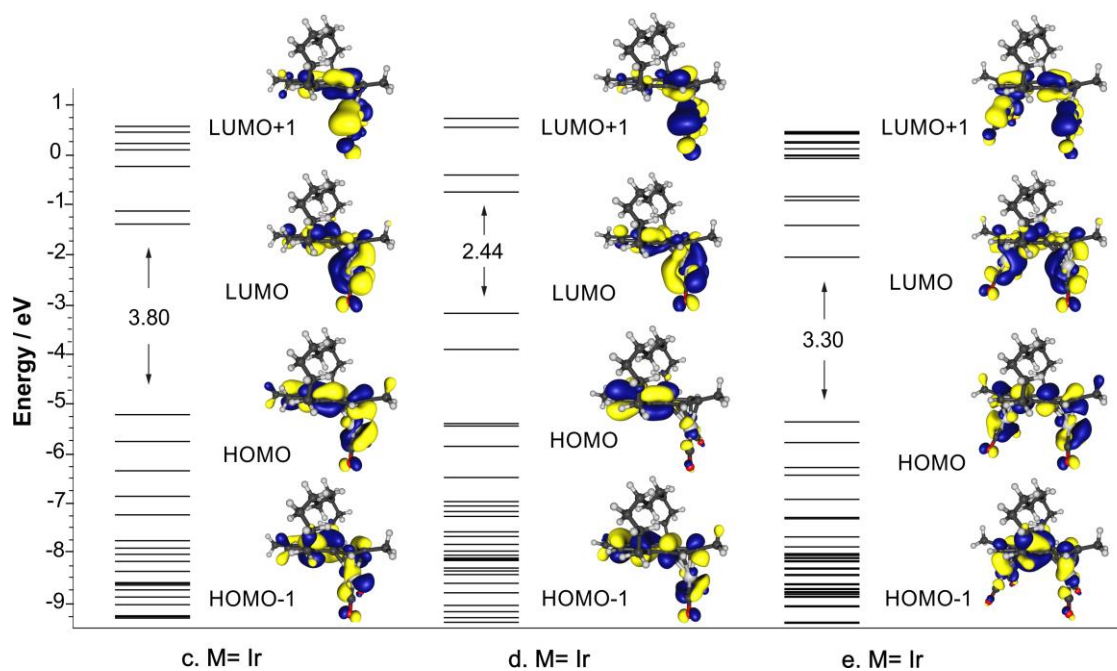

**Figure S13.** **c.** monometallic neutron, **d.** monometallic monoanion and **e.** bimetallic system with  $M=Ir$ ,  $L=(CO)_2$  and  $R=CH_3$ .

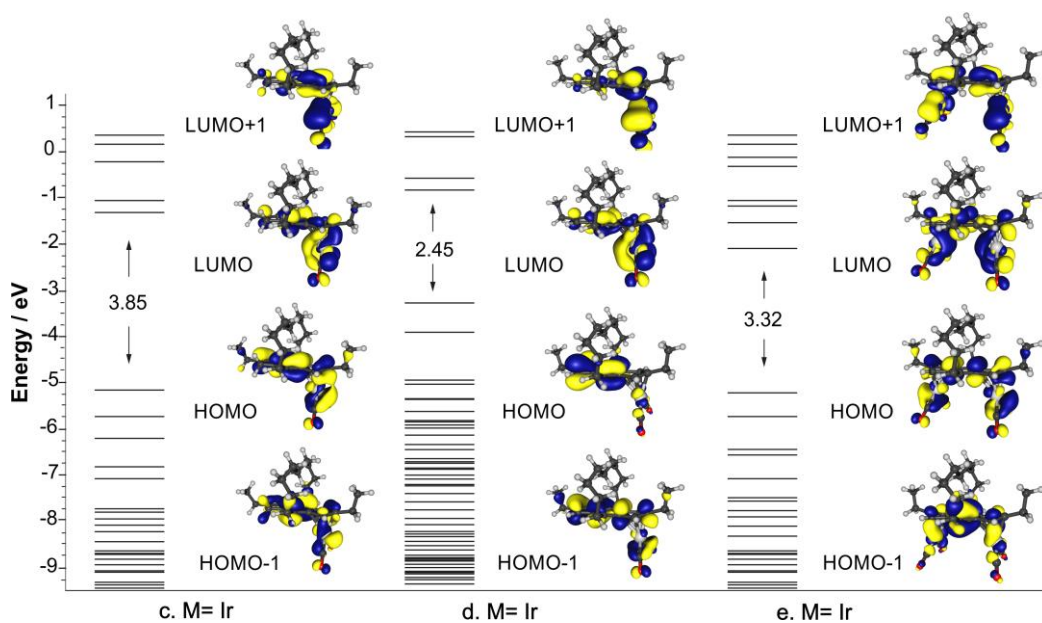

**Figure S14.** c. monometallic neutron, d. monometallic monoanion and e. bimetallic system with M=Ir, L=(CO)<sub>2</sub> and R=CH<sub>2</sub>CH<sub>3</sub>.

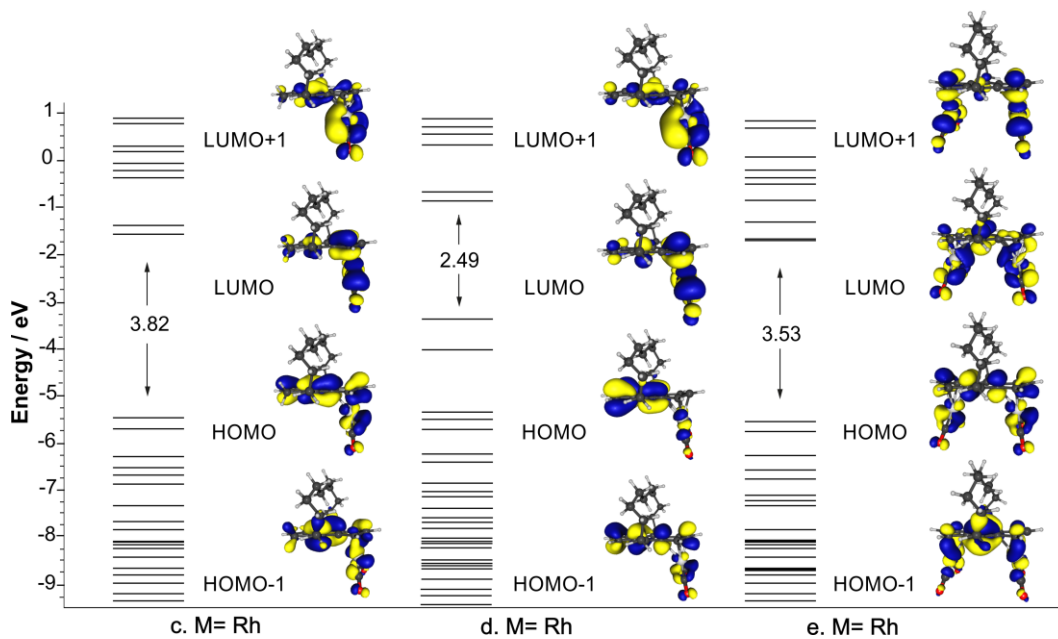

**Figure S15.** c. monometallic neutron, d. monometallic monoanion and e. bimetallic system with M=Rh, L=(CO)<sub>2</sub> and R=H.



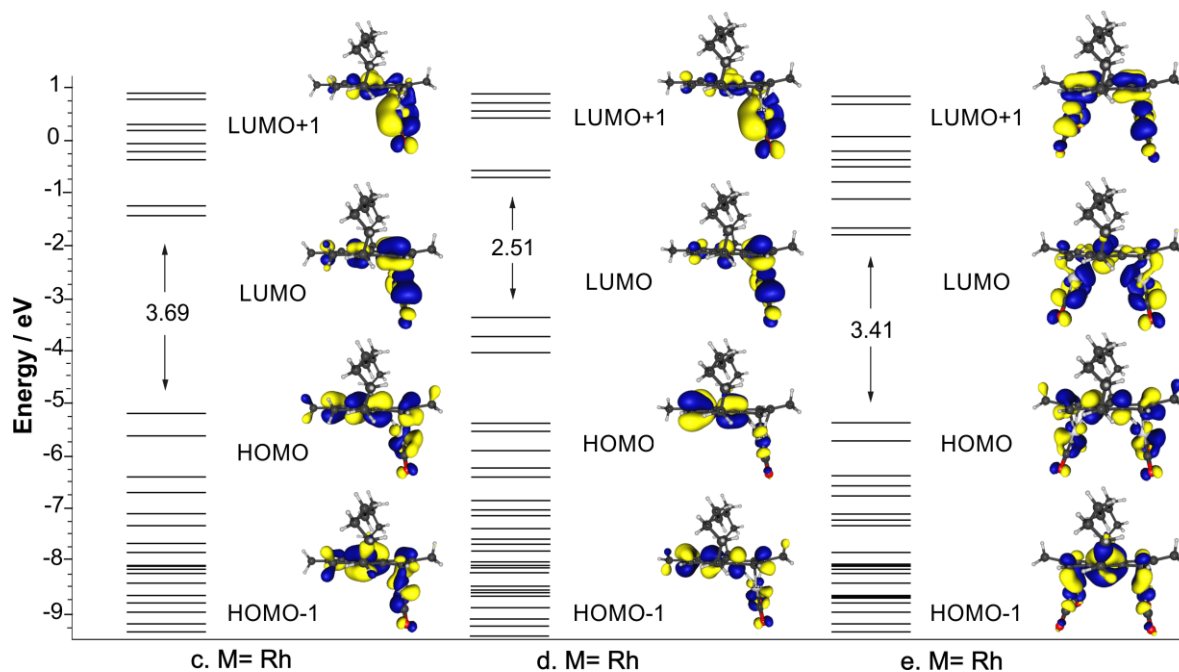

**Figure S16.** **c.** monometallic neutron, **d.** monometallic monoanion and **e.** bimetallic system with  $M = \text{Rh}$ ,  $L = (\text{CO})_2$  and  $R = \text{CH}_3$ .

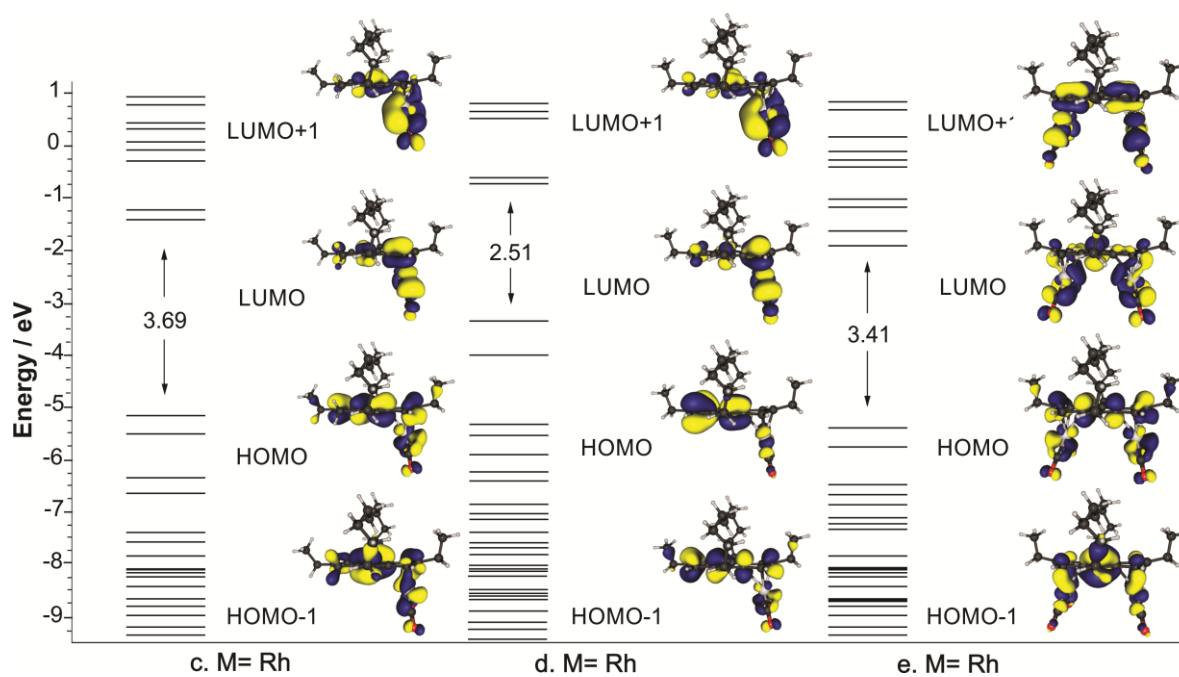

**Figure S17.** **c.** monometallic neutron, **d.** monometallic monoanion and **e.** bimetallic system with  $M = \text{Rh}$ ,  $L = (\text{CO})_2$  and  $R = \text{CH}_2\text{CH}_3$ .

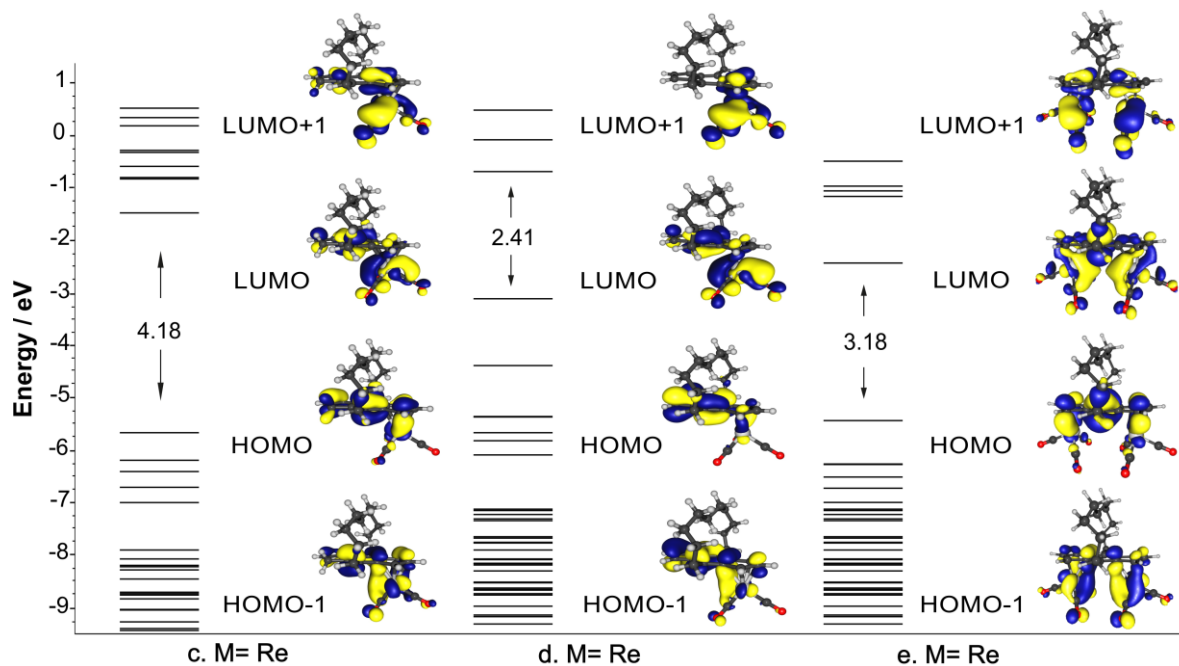

**Figure S18.** **c.** monometallic neutron, **d.** monometallic monoanion and **e.** bimetallic system with  $M=Re$ ,  $L=(CO)_3$  and  $R=H$ .

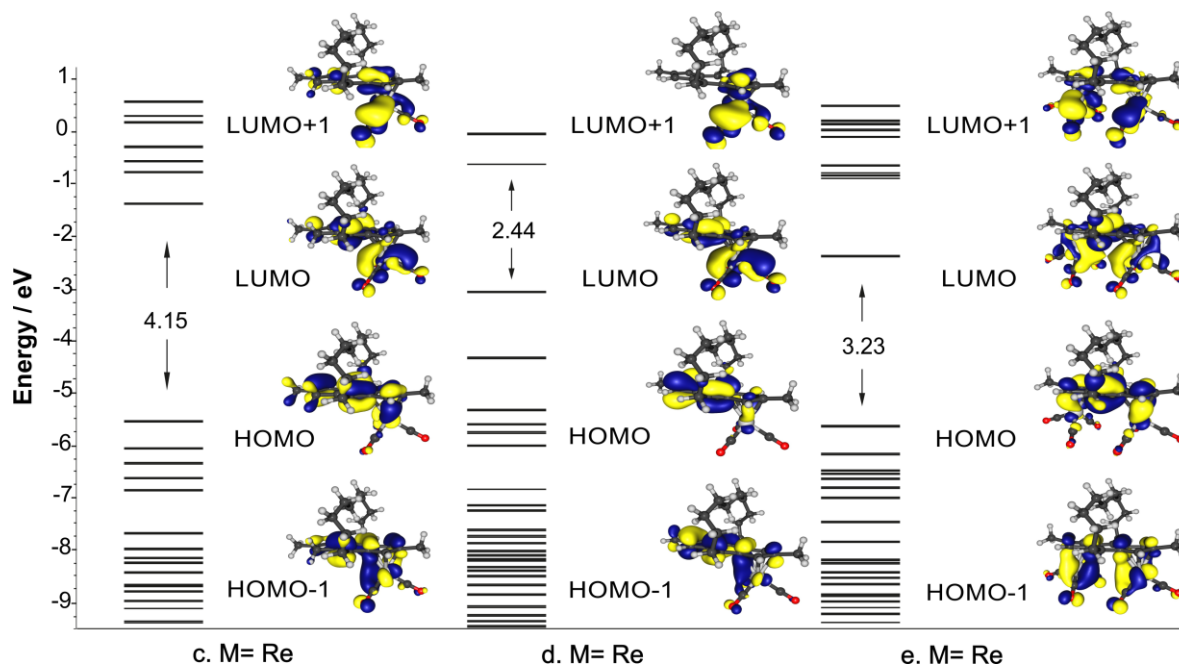

**Figure S19.** **c.** monometallic neutron, **d.** monometallic monoanion and **e.** bimetallic system with  $M=Re$ ,  $L=(CO)_3$  and  $R=CH_3$ .

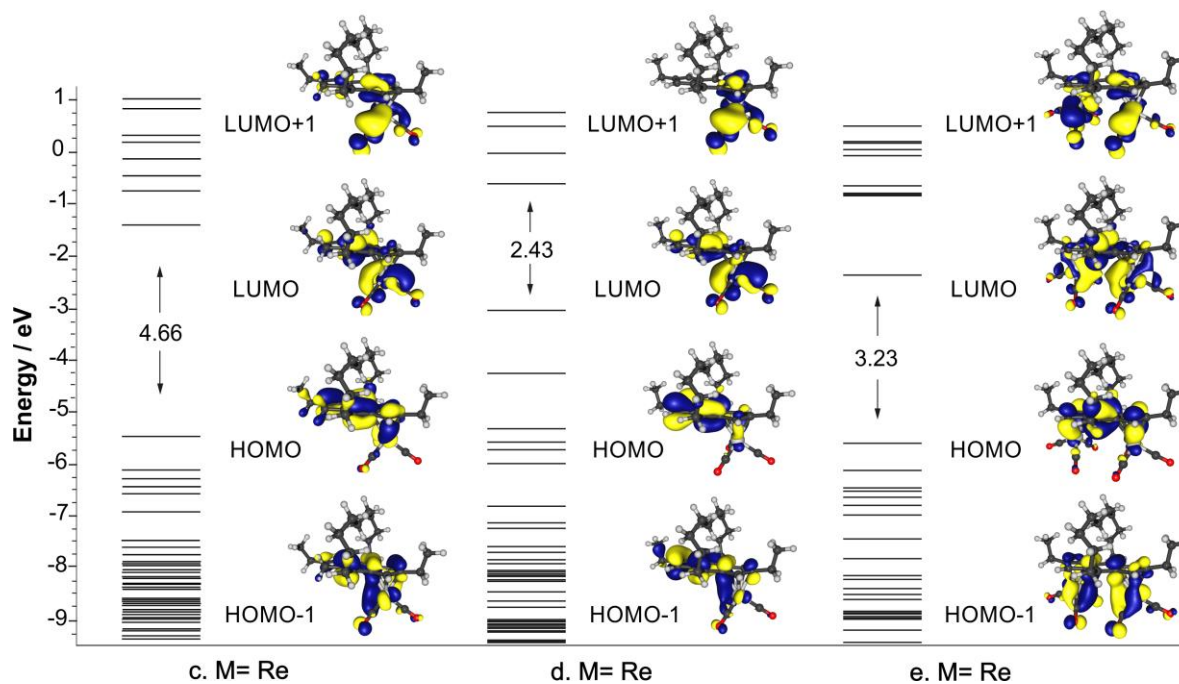

**Figure S20.** **c.** monometallic neutron, **d.** monometallic monoanion and **e.** bimetallic system with  $M=Re$ ,  $L=(CO)_3$  and  $R=CH_2CH_3$ .
